# Supplementary material
Source: PubMed Central journal article supplement (PMC2276809)
Supplement: JCI0834773sd.pdf [file JCI0834773sd.pdf]

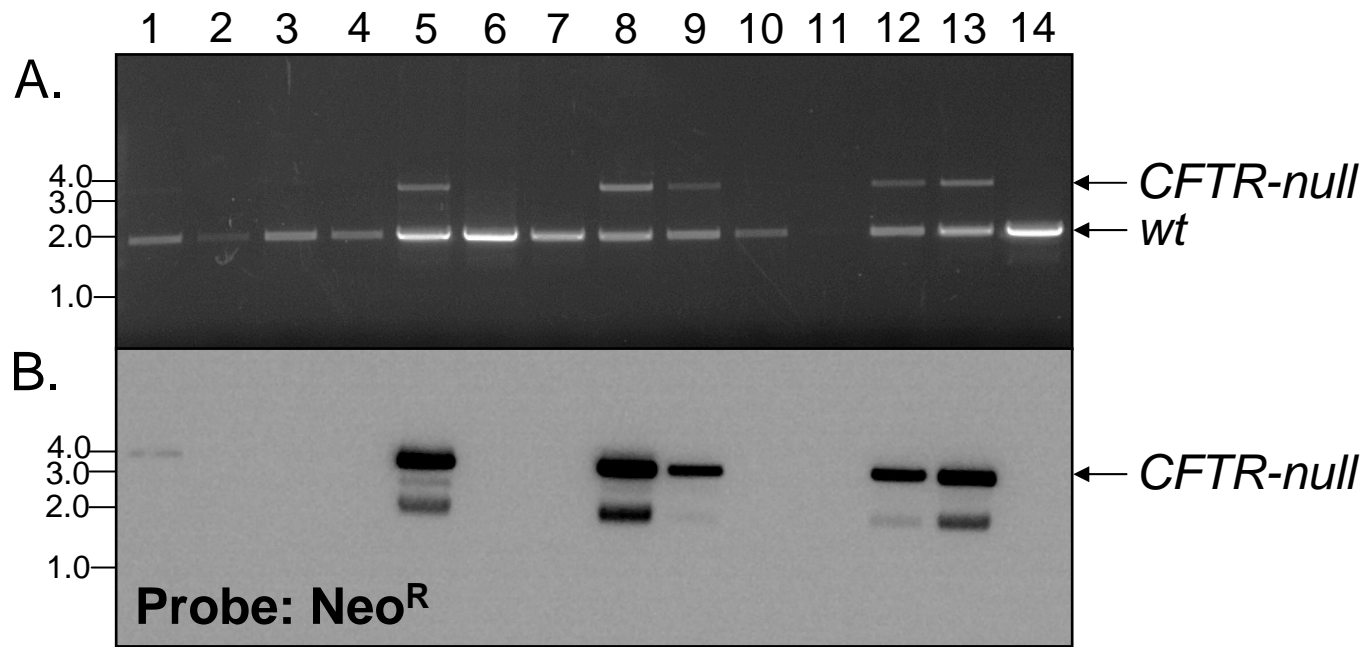

Figure S1

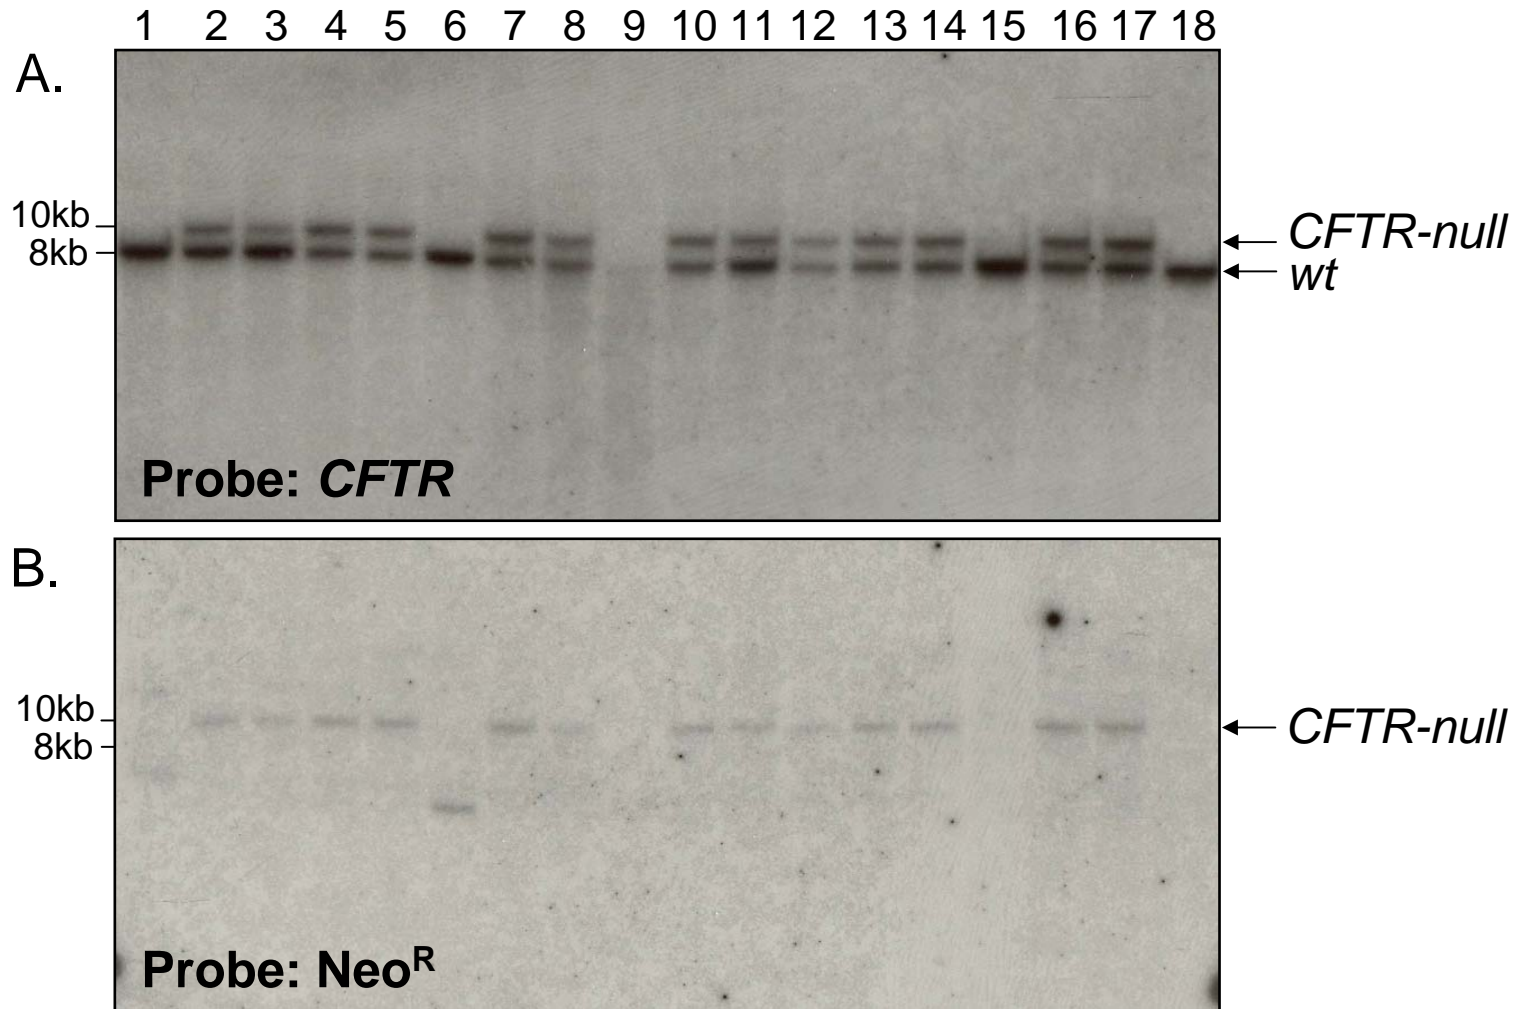

Figure S2

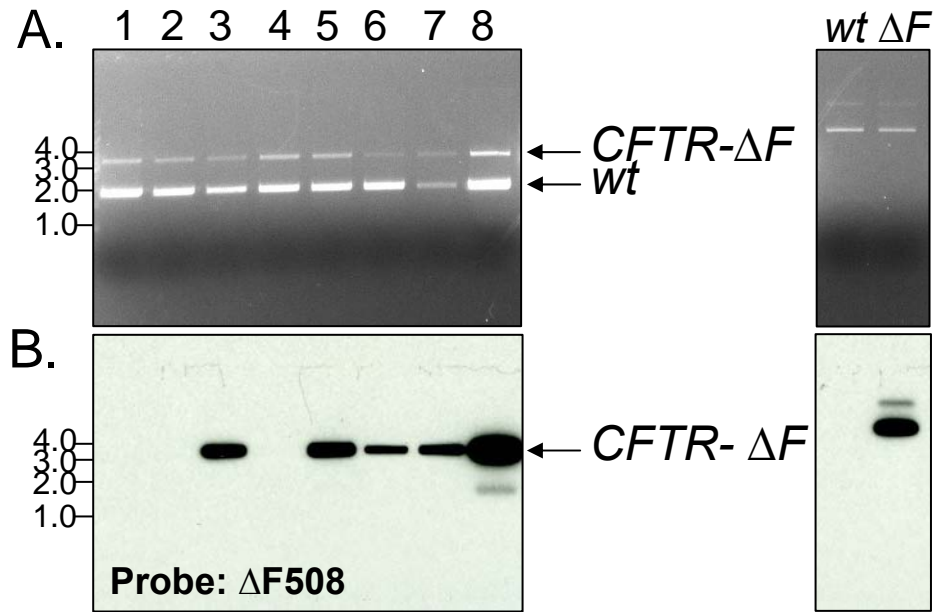

Figure S3

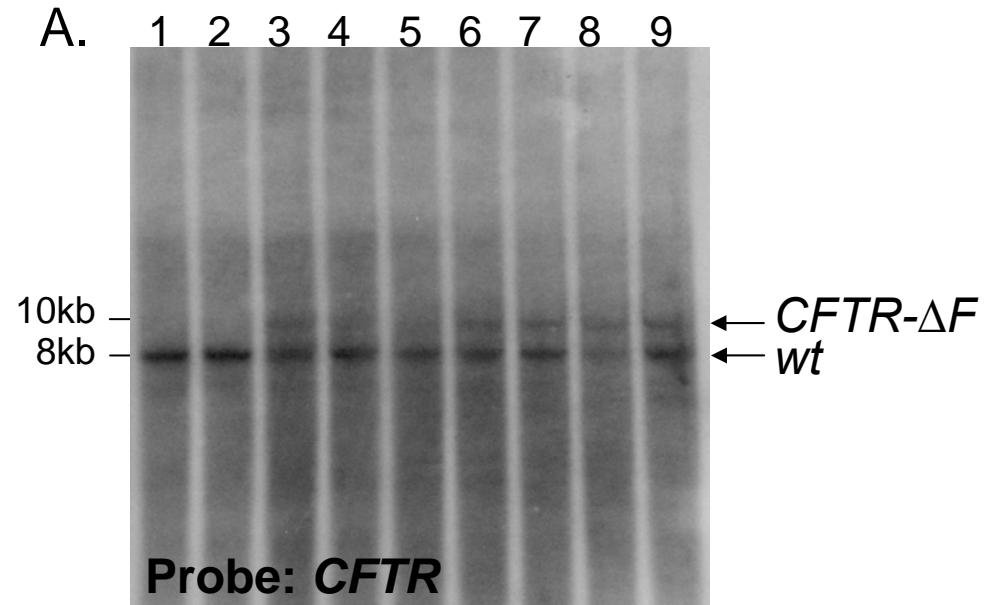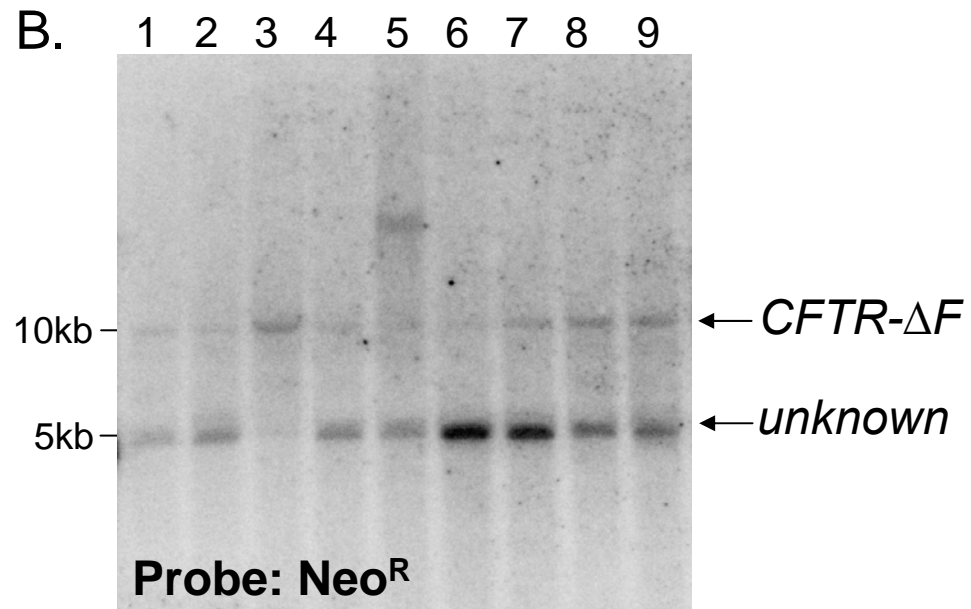

Figure S4

## LEGENDS FOR SUPPLEMENTAL FIGURES

**Figure S1.** Screening results from *CFTR-null* targeted pig fetal fibroblasts. **A)** Example of PCR results. Primers amplified a 2.0 kb product from the wild-type allele and 3.7 kb product from the *CFTR-null* allele. Lanes 5, 8, 9, 12, and 13 are examples of PCR-positive clones. **B)** Southern blot of the PCR gel using a Neo<sup>R</sup>-specific biotin-labeled oligonucleotide. This assay confirms that the 3.7kb product contains the Neo<sup>R</sup> sequence. The weaker hybridization signal at 2.0 kb appears to be an artifact, with some of the targeted band co-migrating with the wild-type product. Note the differences in intensity of the two bands in panel A relative to panel B.

**Figure S2.** Genomic Southern blot of DNA from *CFTR-null* targeted pig fetal fibroblasts. **A)** *Bgl*III-digested genomic DNA was hybridized with a probe that detects pig *CFTR* downstream of the targeting vector boundary. *CFTR-null*-targeted allele yields a ~9.7 kb band and wild-type is ~7.9 kb. These blots also allowed us to identify wells containing monoclonal colonies and those containing more than one type of G418<sup>R</sup> colony. For example, wells 3 and 11 appeared to have a more intense signal in the wild-type band than the targeted band, indicating that those wells likely contained one targeted clone and one or more random integration events. **B)** The same digested DNAs were hybridized with a Neo<sup>R</sup>-specific probe. The *CFTR-null*-targeted band is at ~9.7 kb. Note that the band in lane 6 likely represents a random integration event, and Lane 1 may have two random integration events. Wells 4, 5, 7, 8, 10, 12-14, 16 and 17 are examples of cells that may be ideal nuclear donors for generating a heterozygote animal

**Figure S3.** Screening results from *CFTR-ΔF508* targeted pig fetal fibroblasts. **A)**

Example of PCR results. Primers amplified a 2.0 kb product from the wild-type allele and 3.7kb product from the *CFTR-ΔF508* allele. **B)** Southern blot of the PCR gel using a *ΔF508* allele-specific biotin-labeled oligonucleotide. This assay confirms some of the 3.7kb products contained the *ΔF508* mutation. Note that lanes 1, 2, and 4 contain clones that underwent homologous recombination but failed to carry the *ΔF508* mutation. On the right, wells contained either wild-type *CFTR* or *CFTR-ΔF508* plasmid DNA. This control is included to ensure that the assay Southern blot is specific to *ΔF508*.

**Figure S4.** Southern blot of amplified genomic DNA from *CFTR-ΔF508* targeted pig fetal fibroblasts. In contrast to our experience with the *CFTR-null* targeting, the *CFTR-ΔF508* targeted cells failed to proliferate after transfer to larger dishes. As a result, we were unable to obtain sufficient quantities of genomic DNA for a genomic Southern blot. Therefore, we used the relatively small amount of DNA for whole genome amplification. **A)** *Bgl*III-digested amplified genomic DNA was hybridized with a probe that detects pig *CFTR* downstream of the targeting vector boundary. The *CFTR-ΔF508*-targeted allele yields a ~9.7 kb band and the wild-type is ~7.9 kb. **B)** Digested DNAs from similar clones were hybridized with a Neo<sup>R</sup>-specific probe. The *CFTR-ΔF508*-targeted band is at ~9.7 kb. Note that all lanes in this Southern blot contain an intense band at ~5 kb. This band was also present in non-infected fibroblast control DNA wells (not shown). This probe is possibly hybridizing to the endogenous PGK promoter sequence because the probe includes some PGK promoter sequence. Consistent with this, the Neo<sup>R</sup>-probed blot

in Fig. 4A also contains a faint band at 5 kb in all samples if markedly overexposed (not shown).

**Table S1.** PCR Primers and Probes. All DNA sequences are 5'-3'. FAM: 6-carboxyfluorescein; NFQ: Non Fluorescent Quencher.

**Supplementary Table S1.**

| <b>Primer Name</b> | <b>Sequence (5'-3')</b>              |
|--------------------|--------------------------------------|
| GC1F               | TTTCTCTTCTGCCTATTTCCC                |
| GC1R               | AGAAAACACTGAAGGATGCCT                |
| GC2F               | GTTTCAAATAGTTACTCAGTTTGA             |
| GC2R               | CCTCCAAGTACACTAATCTTCTCA             |
| GC3F               | GTAGAGCTGTCAGAGAAGTAA                |
| GC3R               | AAGCCACAGAAGCATATGCAT                |
| GC4F               | AATCACTCTCAGGATGCACAT                |
| GC5F               | ATACTCAGAACAGGAAGTGCT                |
| GC5R               | ATAGCATAAGCTTCACTGTGC                |
| GC6F               | TGTCAGTAGAGAATTAGAGATTA              |
| GC6R               | GCACTACTCACCTACATCCA                 |
| GC7F               | ACCTGGAAGTTGGAACACTCA                |
| GC7R               | GAAGACCCTTTACCTTCTTCTA               |
| GC8F               | CATCCAGCTGCAAACAACATT                |
| GC8R               | AATTATGCCAAACTCCATCTTAT              |
| Ex10a5F            | AGAATTTTCATTCTGCTCTCAGT              |
| G16-Neo5'F-XhoI    | TCAGCTCGAGACCGCTTTGAGAGCAGGTTG       |
| G16-Neo5'R-EcoRV   | GATCGATATCCTAGATGATGTTTTCTTTAATGGTGC |
| G16-Neo3'F-BamHI   | TAGTGGATCCTTGGTGTTCCTATGATGAGTATA    |
| G16-Neo3'R-HindIII | GACTAAGCTTGCCTACCAGAAACCTGCCT        |
| dF-Neo 5'F-XhoI    | TCAGCTCGAGTTTCCAAGGAATATACAACAGA     |
| dF-Neo 5'R-EcoRV   | GATCGATATCGTATGATTTAGGTAGTTTGAAGG    |
| dF-Neo 3'F-BamHI   | TAGTGGATCCATTTAACTTTTTATTCAATCAGTCT  |
| dF-Neo 3'R-HindIII | GACTAAGCTTGCCTCATTCTATGAAGGAGGTA     |



### **Biotin-labeled probes**

| <b>Probe name</b>      | <b>Sequence (Biotin label is on 3' end)</b> |
|------------------------|---------------------------------------------|
| Neo <sup>R</sup> probe | GCATCAGCCATGATGGATAC-Biotin                 |
| $\Delta F508$ probe    | AAAACATCATTGGTGTTC-Biotin                   |

### **Quantitative RT-PCR primers and probes**

Pig *CFTR* and *GAPDH* expression in fetal fibroblasts, nasal and rectal tissue (Figure 1) and *CFTR* expression in *CFTR* +/- pigs (figure 5A).

#### *CFTR* primers and probe

pCFTR-1819F (anneals within exon 18)

AGTGGGCTGTAACTCCAGTATAGA

pCFTR-1819R (anneals withinin exon 19)

CCTTCTGCCGGCATATCAATAAACT

pCFTR-1819 probe (spans exon 18/19 junction)      FAM-ATCGCATCAAGCTATCC-  
NFQ

#### *GAPDH* primers and probe

pGAPDH-TM-F      AAGCTCATTTCTCGTACGACAAT

pGAPDH-TM-R      GGAGGCCATGTGGACCAT

pGAPDH-TM probe      FAM-TCCACCACCCTGTTGCT-  
NFQ

Pig *CFTR* and  $\Delta F508$ -*CFTR* expression in *CFTR* +/- $\Delta F508$  pigs (figure 5B). Primers are the same for both, probes are allele specific.

#### *CFTR* primers and probe

pCFTR-TM-F

TCATGCCGGGCACCATTAAA

pCFTR-TM-R

CGCTTTGATGACACTCCTGTATCTA

pCFTR-TM probe

FAM-ACACCAAAGATGATGTTTTTC-

NFQ

$\Delta$ F508 primers and probe

delF-TM-Forward

TCATGCCGGGCACCATTAAA

delF-TM-Reverse

CGCTTTGATGACACTCCTGTATCTA

delF-TM-Probe

FAM-GAAACACCAATGATGTTTTTC-

NFQ
